# Supplementary material
Source: MDPI journal article supplement (https://www.mdpi.com/2673-7256/1/3/32)
Supplement: s1 [file s1]

**Supplementary Materials:**  
**Remazol Black Decontamination Study Using a Novel One Pot  
Synthesized S and Co Co-Doped TiO<sub>2</sub> Photocatalyst**

Riska Dwiyanra, Roto Roto and Endang Tri Wahyuni \*

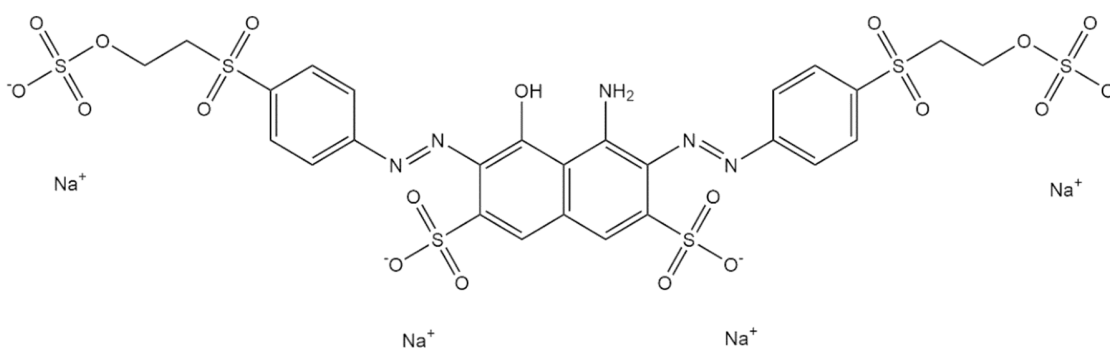

**Figure S1.** Chemical structure of Remazol Black (RBB)

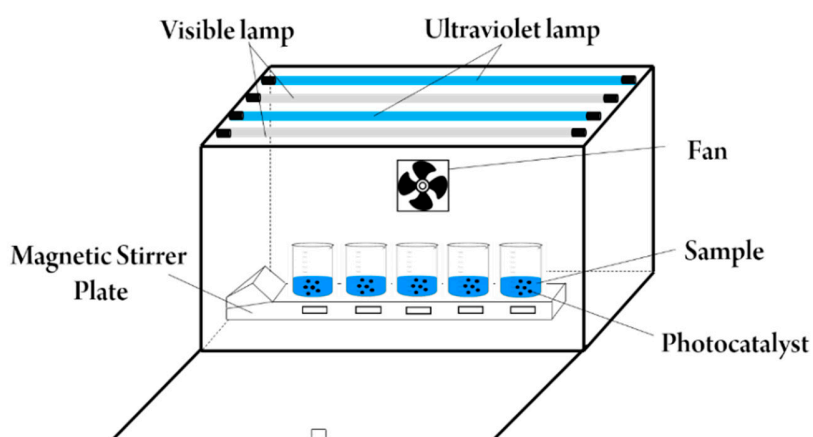

**Figure S2.** Schematic diagram of photoreactor for photocatalytic experiment

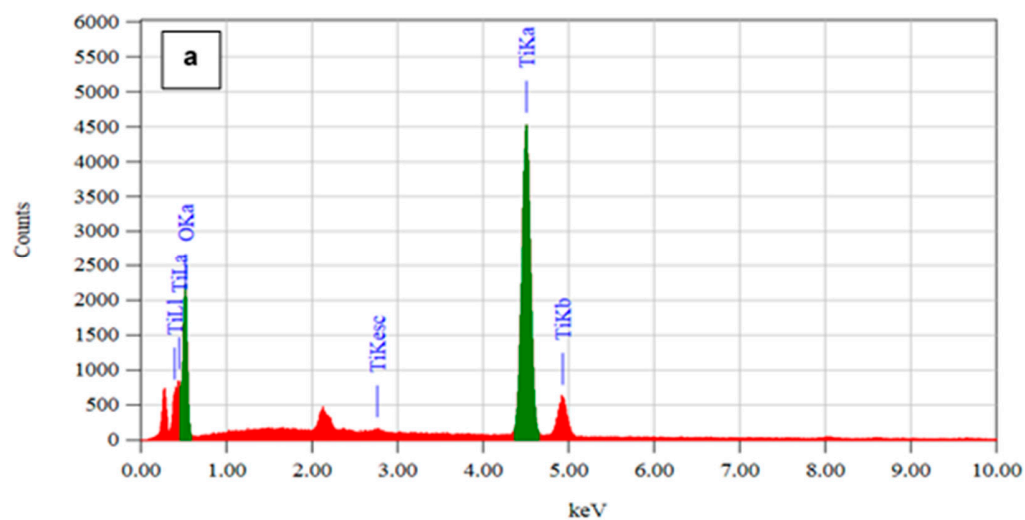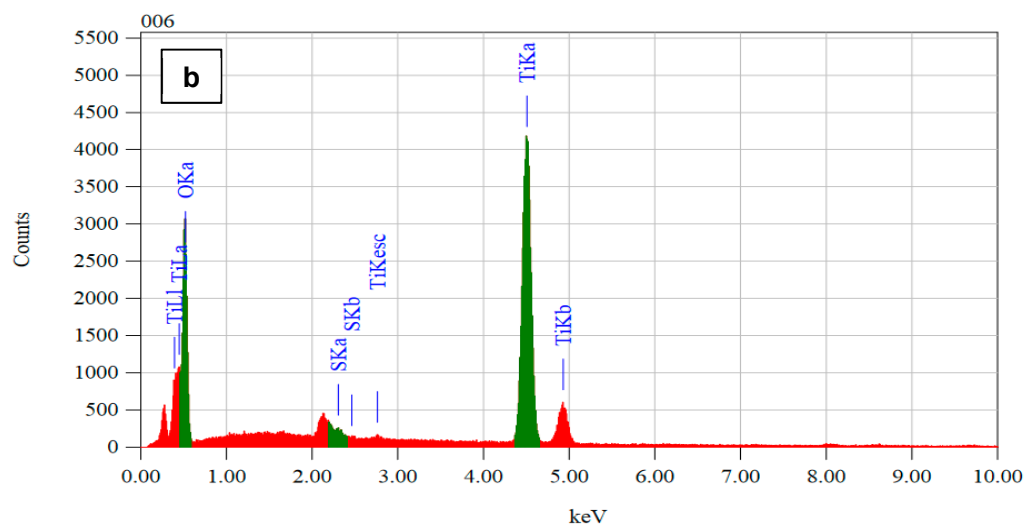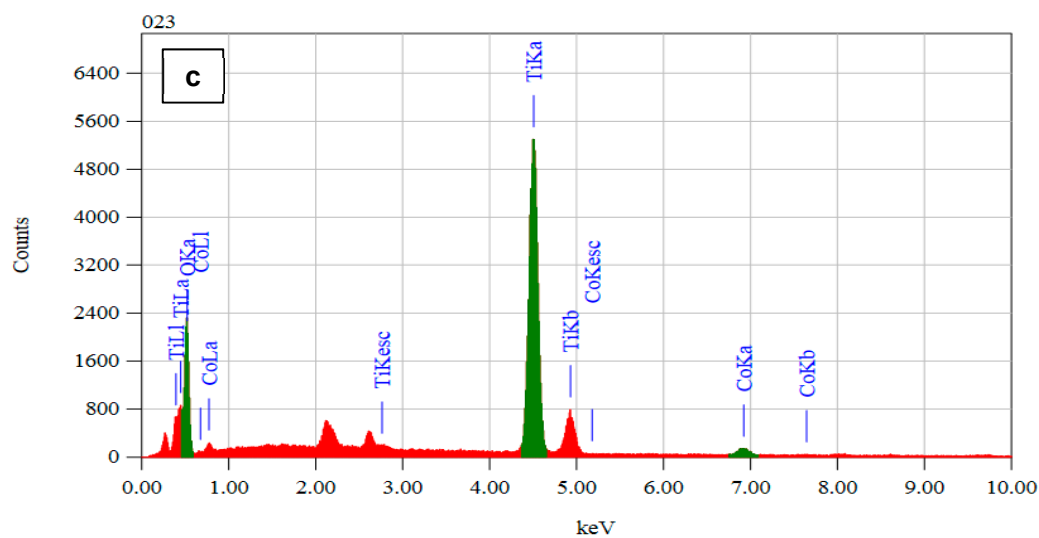

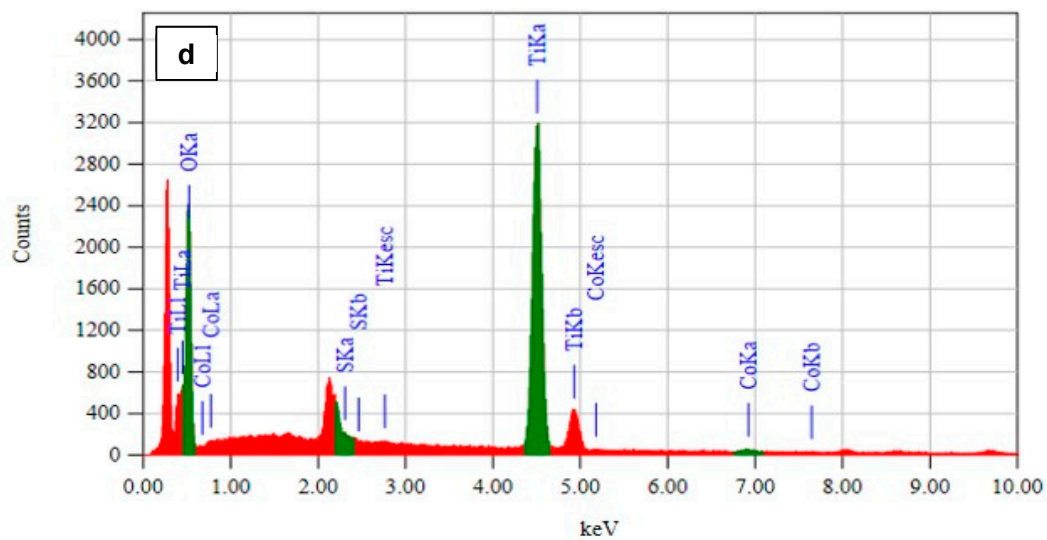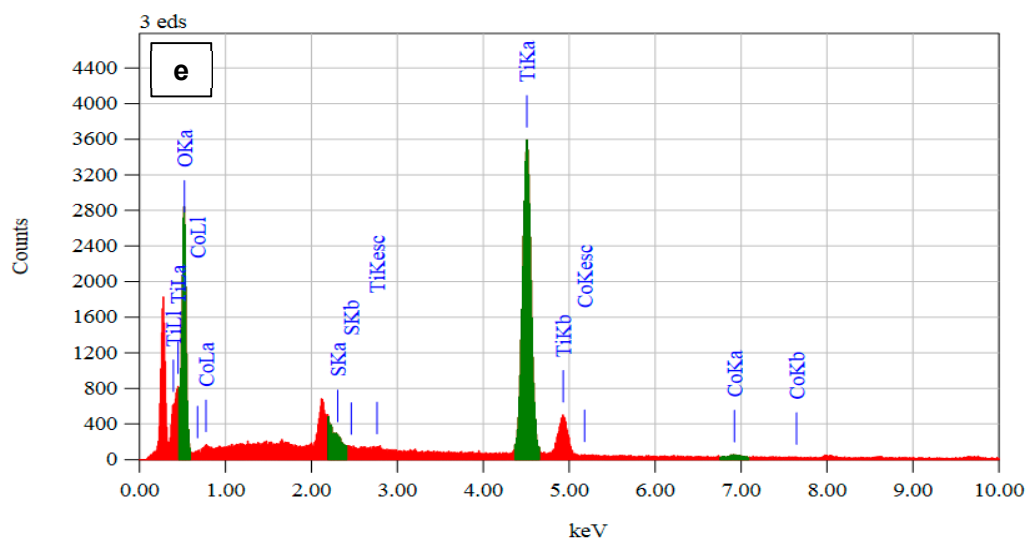

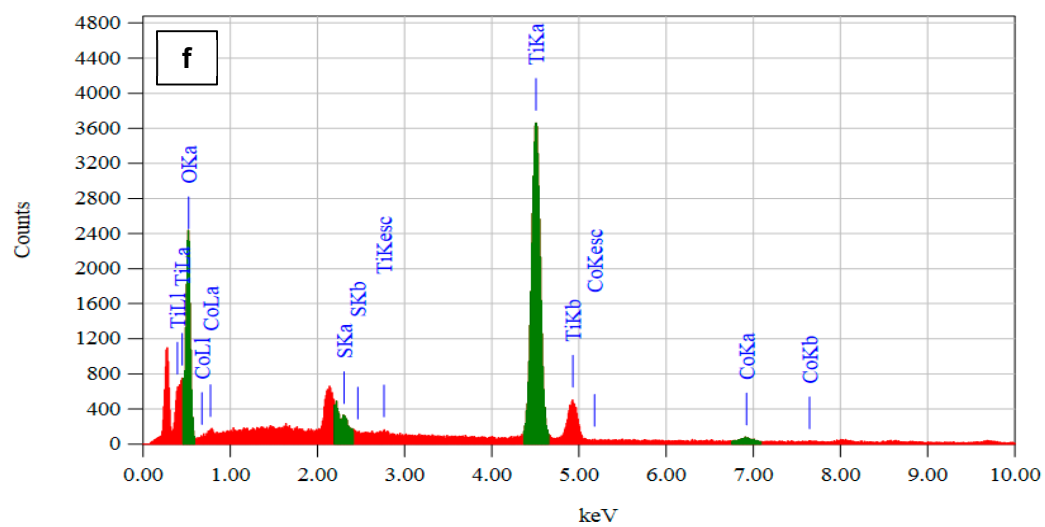

**Figure S3.** EDX pattern of (a)  $\text{TiO}_2$ , (b)  $\text{S-TiO}_2$ , (c)  $\text{Co-TiO}_2$ , (d)  $\text{S-Co-TiO}_2$  4%, (e)  $\text{S-Co-TiO}_2$  6%, and (f)  $\text{S-Co-TiO}_2$  8%

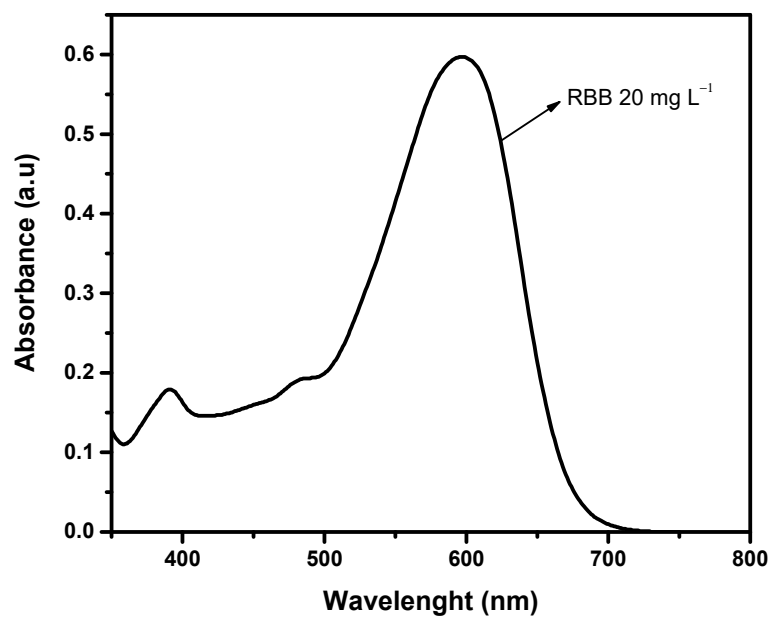

Figure 4. Absorption spectrum of Remazol Black analyzed by spectrophotometry, Remazol Black concentration: 20 mg L<sup>-1</sup>

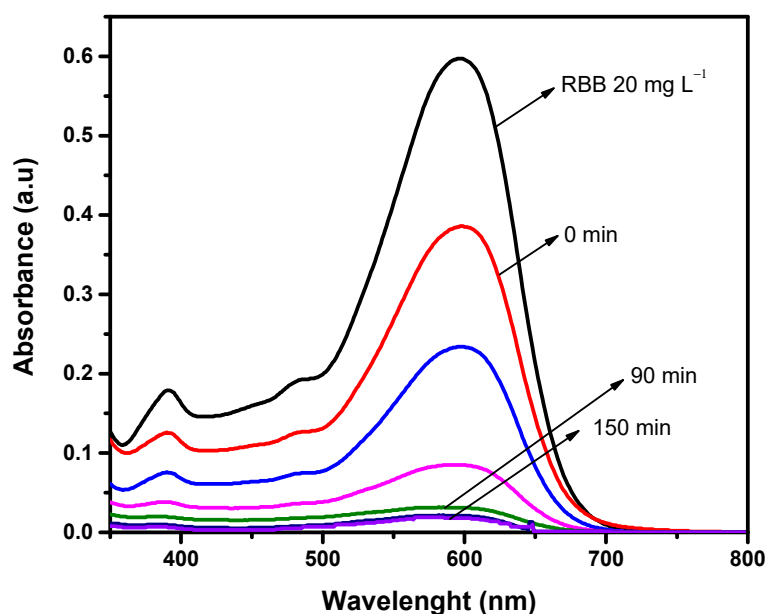

**Figure S5.** Spectrum of Remazol Black after decolorization by S-Co-TiO<sub>2</sub> 8% photocatalyst for 150 minutes visible light irradiation, photocatalyst dose: 1.0 g L<sup>-1</sup>, initial pH: 5.5, Remazol Black concentration: 20 mg L<sup>-1</sup>

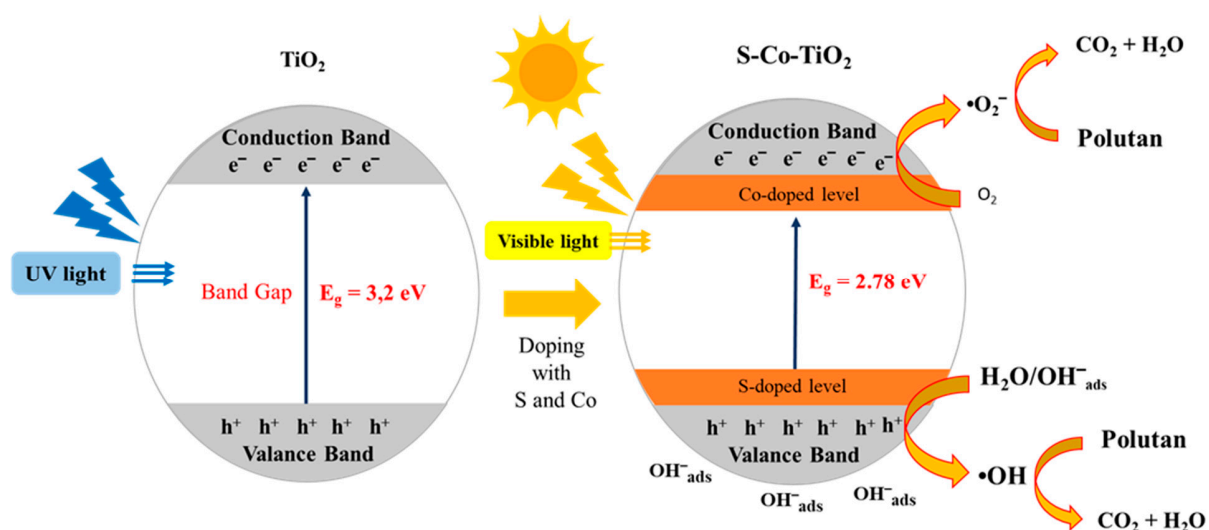

**Figure S6.** Schematic diagram of photocatalytic decolorization of RBB by S-Co-TiO<sub>2</sub> photocatalyst
